# Supplementary material for: Self-Assembly Nanostructure of Myristoylated ω-Conotoxin MVIIA Increases the Duration of Efficacy and Reduces Side Effects
Source: MDPI journal article supplement (doi:10.3390/md21040229), 2023-04-01
Supplement: s1 [file s1]

# Self-Assembly Nanostructure of Myristoylated $\omega$ -Conotoxin MVIIA Increases the Duration of Efficacy and Reduces Side Effects

Xiufang Ding <sup>1</sup>, Yue Wang <sup>1,2</sup>, Sida Zhang <sup>1</sup>, Ruihua Zhang <sup>1</sup>, Dong Chen <sup>1</sup>, Long Chen <sup>2</sup>, Yu Zhang <sup>1</sup>, Shi-Zhong Luo <sup>2</sup>, Jianfu Xu <sup>1,\*</sup> and Chengxin Pei <sup>1,\*</sup>

- 1     State key Laboratory of NBC Protection for Civilian, Beijing 102205, China  
2     Beijing Key Laboratory of Bioprocess, College of Life Science and Technology, Beijing University of Chemical Technology, Beijing 100029, China  
\*     Correspondence: jianfuxu2000@hotmail.com (J.X.); peichengxin@sklnbcpc.cn (C.P.)

**Table S1.** Particle sizes of the peptides MVIIA and Myr-MVIIA.

| peptide   | Particle Size (nm) | PDI   |
|-----------|--------------------|-------|
| MVIIA     | 48.74 ± 16.07      | 0.514 |
| Myr-MVIIA | 301.83 + 98.09     | 0.400 |

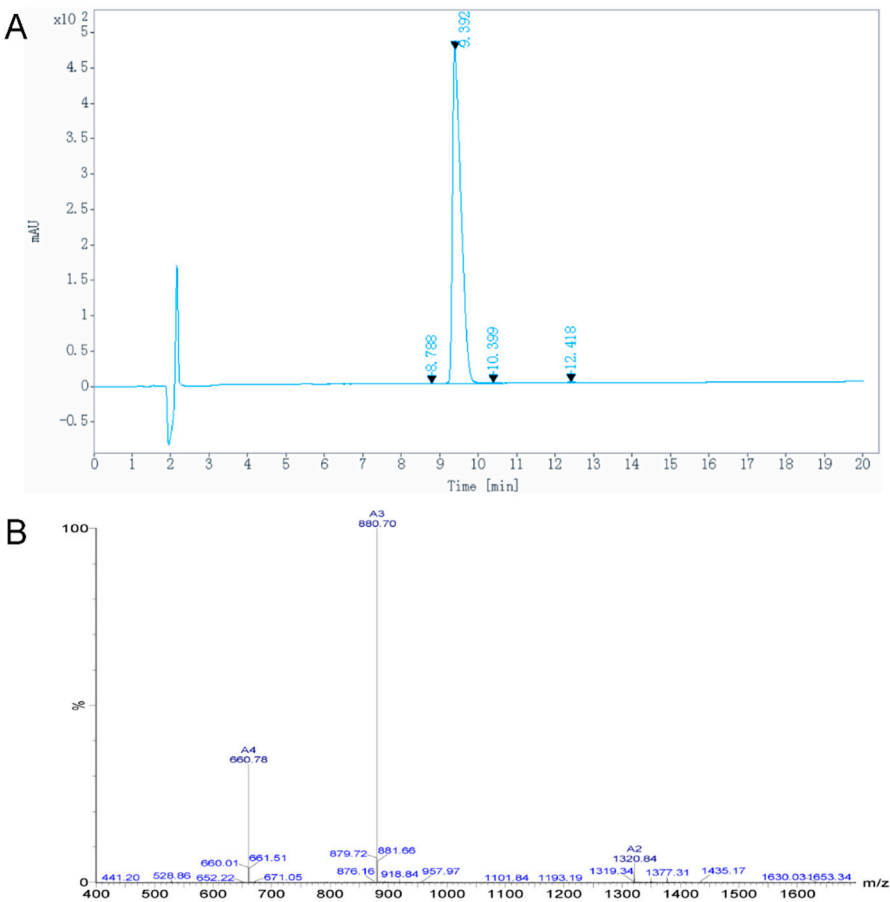

**Figure S1.** (A) HPLC of MVIIA (B) The molecular mass of the MVIIA was determined by ESI-MS.  
expected mass: 2639.2, observed mass: [M+2H]<sup>2+</sup>: 1320.84, [M+3H]<sup>3+</sup>: 880.70, [M+4H]<sup>4+</sup>: 660.78.

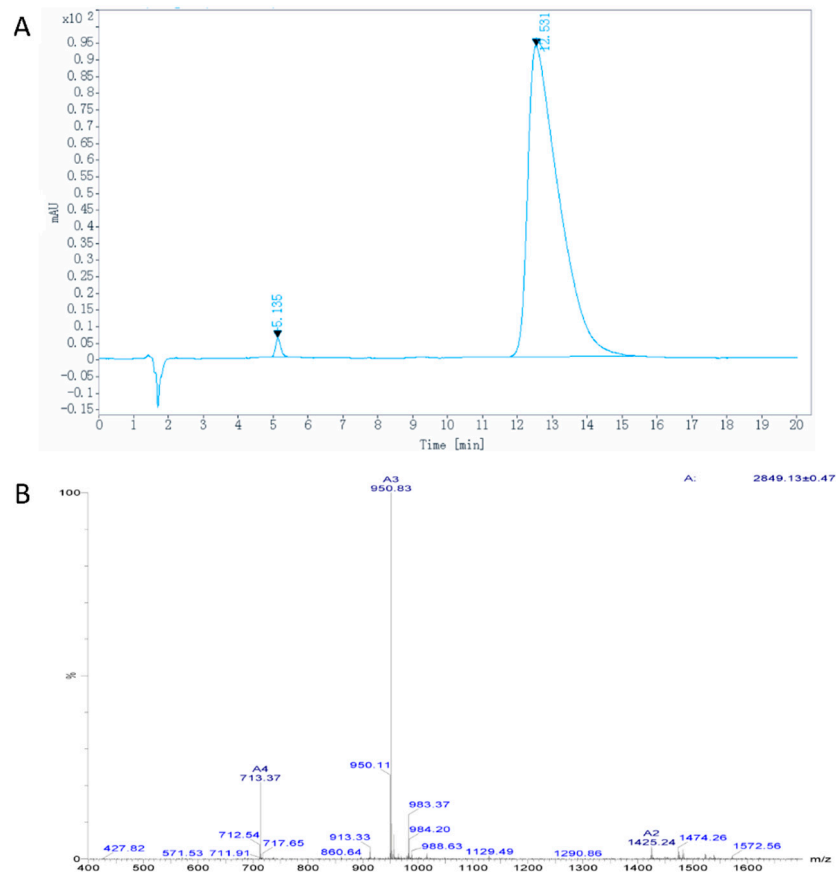

**Figure S2.** (A) HPLC of Myr-MVIIA (B) The molecular mass of the Myr-MVIIA was determined by ESI-MS. expected mass: 2849.5, observed mass:  $[M+2H]/2$ : 1425.24,  $[M+3H]/3$ : 950.83,  $[M+4H]/4$ : 713.37.
